# Supplementary material
Source: publisher site journal article supplement (https://www.degruyter.com/publication/journal_key/CMB/downloadAsset/CMB_CFP%20Recent%20Trends%20in%20Mathematical%20Biology,%20Theory,%20Methods,%20and%20Applications.pdf)
Supplement: Supplementary file 1 [file CMB_CFP%20Recent%20Trends%20in%20Mathematical%20Biology,%20Theory,%20Methods,%20and%20Applications.pdf]

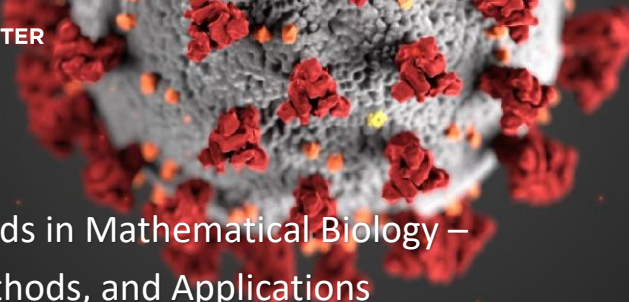

*Special Issue:*

# Recent Trends in Mathematical Biology – Theory, Methods, and Applications

## GUEST EDITORS

---

### LEAD GUEST EDITOR

**Dr. Krishna Kiran Vamsi Dasu**, Department of Mathematics and Computer Science, Sri Sathya Sai Institute of Higher Learning (SSSIHL), India - [dkkvamsi@sssihl.edu.in](mailto:dkkvamsi@sssihl.edu.in)

### GUEST EDITORS

**Dr. Muthu Poosan Moopanar**, Department of Mathematics, National Institute of Technology (N.I.T), India  
[pm@nitw.ac.in](mailto:pm@nitw.ac.in)

**Dr. Jai Prakash Tripathi**, Department of Mathematics, Central University of Rajasthan, India  
[jaiprakash\\_math@curaj.ac.in](mailto:jaiprakash_math@curaj.ac.in)

**Dr. Ram Singh**, School of Engineering and Technology, BGSB University, India [rsingh@bgsbu.ac.in](mailto:rsingh@bgsbu.ac.in)

## DESCRIPTION

---

The “*National Conference on Recent Trends in Mathematical Biology – Theory, Methods, and Applications*” is being organized by the Department of Mathematics and Computer Science (DMACS), Sri Sathya Sai Institute of Higher Learning (SSSIHL), A. P. India during July 20-22, 2023 at the Prasanthi Nilayam Campus.

The main focus of this In-Person conference is to provide a stage for the sharing of knowledge regarding the development of mathematical models in biological systems, tools, and techniques used for the qualitative study of the systems.

This conference will provide a vibrant platform to bring together the scientists, researchers, educators, and PG students across academia, corporate organization and industry to exchange valuable ideas and impart guidelines on technical research and developments. Thus, the conference intends to bring together the best minds across the country to cover all the aspects of biomathematics from a multi-disciplinary perspective, in view of NEP-2020.

Based on talks to be presented in this conference, a special issue entitled “***Recent Trends in Mathematical Biology – Theory, Methods, and Applications***” will be published in the Journal on **Computational and Mathematical Biophysics (CMB)**. This special issue will also focus on the recent development of computational and data science modelling techniques in the field of mathematical biology.

Indexed in SCOPUS and MathSciNet, CMB ([www.degruyter.com/cmb](http://www.degruyter.com/cmb)) is the formal continuation of Molecular Based Mathematical Biology, published by De Gruyter. The mission of CMB is to publish the highest quality research works that promote the development of theoretical formulations, mathematical models, numerical algorithms, and computational techniques for biosciences and biophysics.

Potential topics includes, but are not limited to:

- Mathematical Biology
- Mathematical Modelling: Ecology and Epidemiology
- Computational Modelling
- Parameter Estimation
- Predicative Analytics
- Uncertainty

## HOW TO SUBMIT

---

Before submission authors should carefully read over the author guidelines, which are located at [www.degruyter.com/journal/key/cmb/html](http://www.degruyter.com/journal/key/cmb/html).

All manuscripts are subject to the standard peer review process before publication.

The articles are subject to the discounted [Article Processing Charge](#) (APC) of 150 Euro, paid after the acceptance of their manuscript.

Prospective authors should submit their manuscript online at [www.editorialmanager.com/mlbmb](http://www.editorialmanager.com/mlbmb), and select the Article Type as this special issue.

## IMPORTANT DATES

---

**Manuscript submission due date:** November 31, 2023

**Anticipated publication date of special issue:** March 31, 2024
